# Supplementary material for: Expression analysis of inflammasomes in experimental models of inflammatory and fibrotic liver disease
Source: PubMed Central journal article supplement (PMC3599703; doi:10.1186/1476-9255-9-49), 2012-11-28

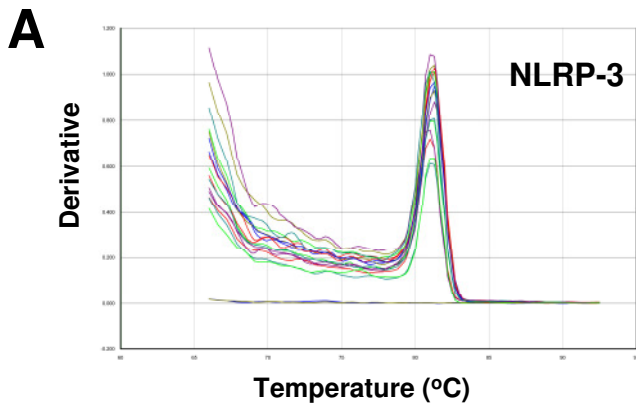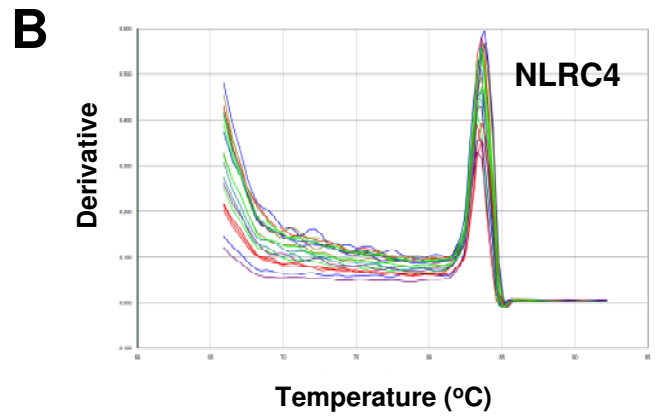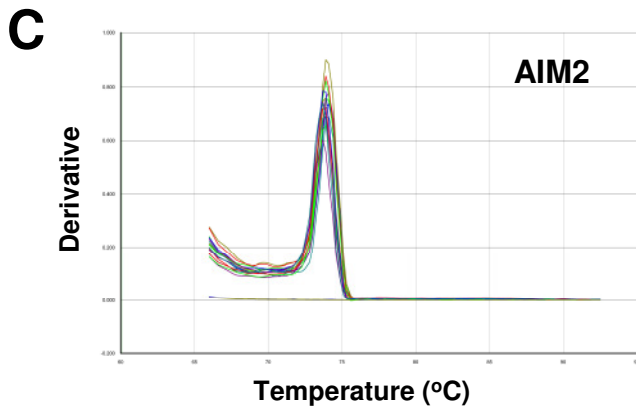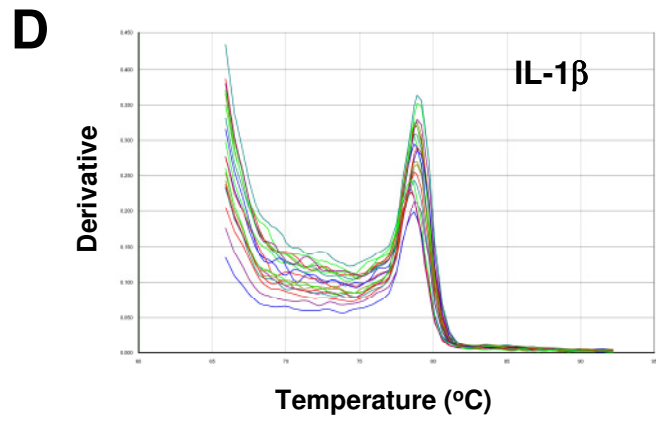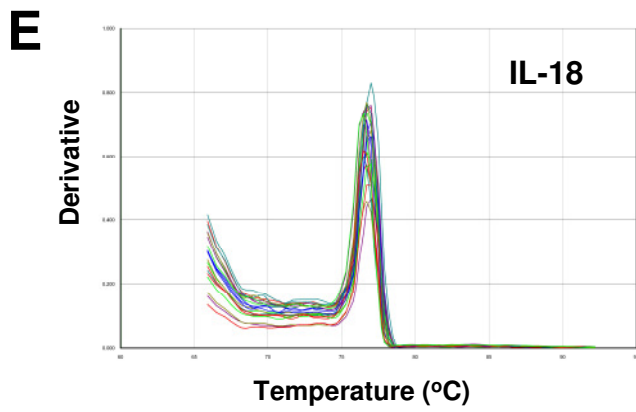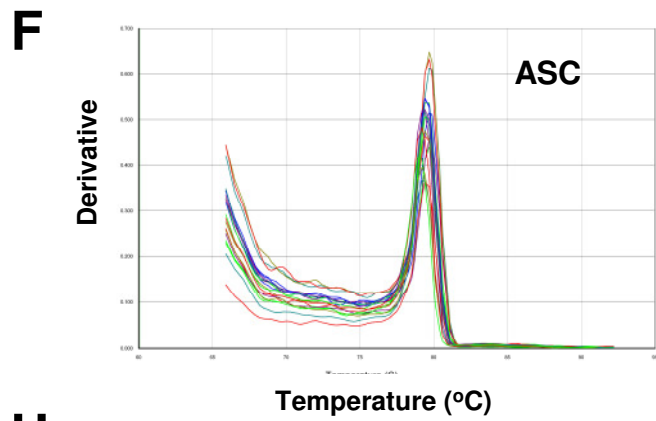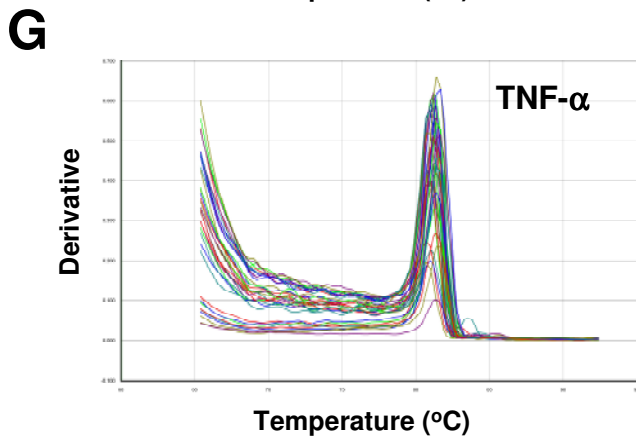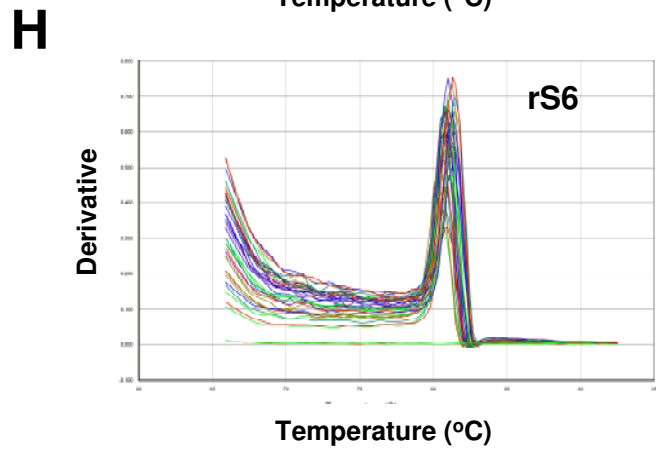

Supplement: 1476-9255-9-49-S2.pdf [file 1476-9255-9-49-S2.pdf]
